# Supplementary material
Source: HighWire-hosted journal article supplement (https://bmjopen.bmj.com/content/11/12/e054705)
Supplement: inline-supplementary-material-1 [file inline-supplementary-material-1.pdf]

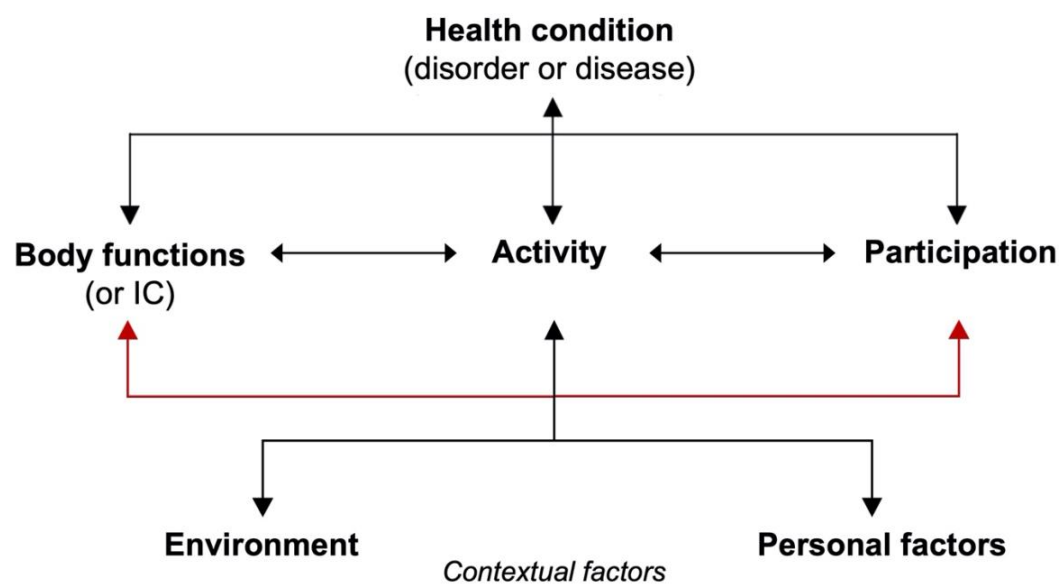

Supplementary Figure 1. The International Classification of Functioning, Disability and Health (ICF) framework. The red arrow indicates the relationship of interest in the present study.

Supplementary Table 1. Sequential regression analyses of life space area on intrinsic capacity

| Model    | Predictors                              | $\beta$ | SE    | P value | 95% CI         |
|----------|-----------------------------------------|---------|-------|---------|----------------|
| <b>1</b> | IC                                      | 6.33*   | 0.708 | <0.001  | [4.94, 7.72]   |
| <b>2</b> | IC                                      | 4.76*   | 0.782 | <0.001  | [3.22, 6.29]   |
|          | Age                                     | -0.330* | 0.109 | 0.003   | [-.545, -.115] |
|          | Male                                    | 4.66*   | 1.71  | 0.007   | [1.30, 8.02]   |
|          | Secondary/Higher education              | 1.31    | 1.46  | 0.368   | [-1.54, 4.17]  |
|          | 2-room flat or larger                   | 1.83    | 1.61  | 0.257   | [-1.33, 4.99]  |
|          | Still working                           | 9.55*   | 1.63  | <0.001  | [6.34, 12.8]   |
|          | Fair/more than enough disposable income | -0.046  | 1.77  | 0.979   | [-3.51, 3.42]  |
|          | Living alone                            | 0.387   | 2.02  | 0.848   | [-3.59, 4.36]  |
|          | Attend community/religious activities   | 3.78*   | 1.89  | 0.046   | [0.072, 7.49]  |
|          | Have confidant                          | -0.130  | 2.08  | 0.950   | [-4.22, 3.96]  |
|          | Frequent contact with relatives/friends | 7.44*   | 1.82  | <0.001  | [3.87, 11.0]   |
|          | Help others                             | 1.20    | 1.51  | 0.428   | [-1.77, 4.16]  |
| <b>3</b> | IC                                      | 4.51*   | 1.09  | <0.001  | [2.37, 6.66]   |
|          | Age                                     | -0.320* | 0.110 | 0.004   | [-.537, -.104] |
|          | Male                                    | 4.59*   | 1.72  | 0.008   | [1.21, 7.96]   |
|          | IC*Age                                  | 0.082   | 0.100 | 0.412   | [-.114, .278]  |
|          | IC*Male                                 | -0.130  | 1.45  | 0.928   | [-2.97, 2.71]  |
|          | Secondary/Higher education              | 1.35    | 1.46  | 0.355   | [-1.51, 4.21]  |
|          | 2-room flat or larger                   | 1.82    | 1.61  | 0.260   | [-1.35, 4.98]  |
|          | Still working                           | 9.57*   | 1.64  | <0.001  | [6.36, 12.8]   |
|          | Fair/more than enough disposable income | -0.034  | 1.77  | 0.985   | [-3.52, 3.45]  |
|          | Living alone                            | 0.292   | 2.03  | 0.886   | [-3.69, 4.28]  |
|          | Attend community/religious activities   | 3.85*   | 1.89  | 0.043   | [.130, 7.56]   |
|          | Have confidant                          | -0.100  | 2.09  | 0.962   | [-4.20, 4.00]  |
|          | Frequent contact with relatives/friends | 7.51*   | 1.82  | <0.001  | [3.93, 11.1]   |
|          | Help others                             | 1.16    | 1.51  | 0.443   | [-1.81, 4.13]  |

Abbreviations:  $\beta$ , Coefficient; IC, Intrinsic Capacity; SE, Standard Error.

\* p&lt;0.05
